# Supplementary material for: Relationships Between Gastrointestinal Parasite Infections and the Fecal Microbiome in Free-Ranging Western Lowland Gorillas
Source: PubMed Central journal article supplement (PMC6013710; doi:10.3389/fmicb.2018.01202), 2018-06-15
Supplement: Data_Sheet_1.pdf [file Data_Sheet_1.pdf]

## Supplementary materials

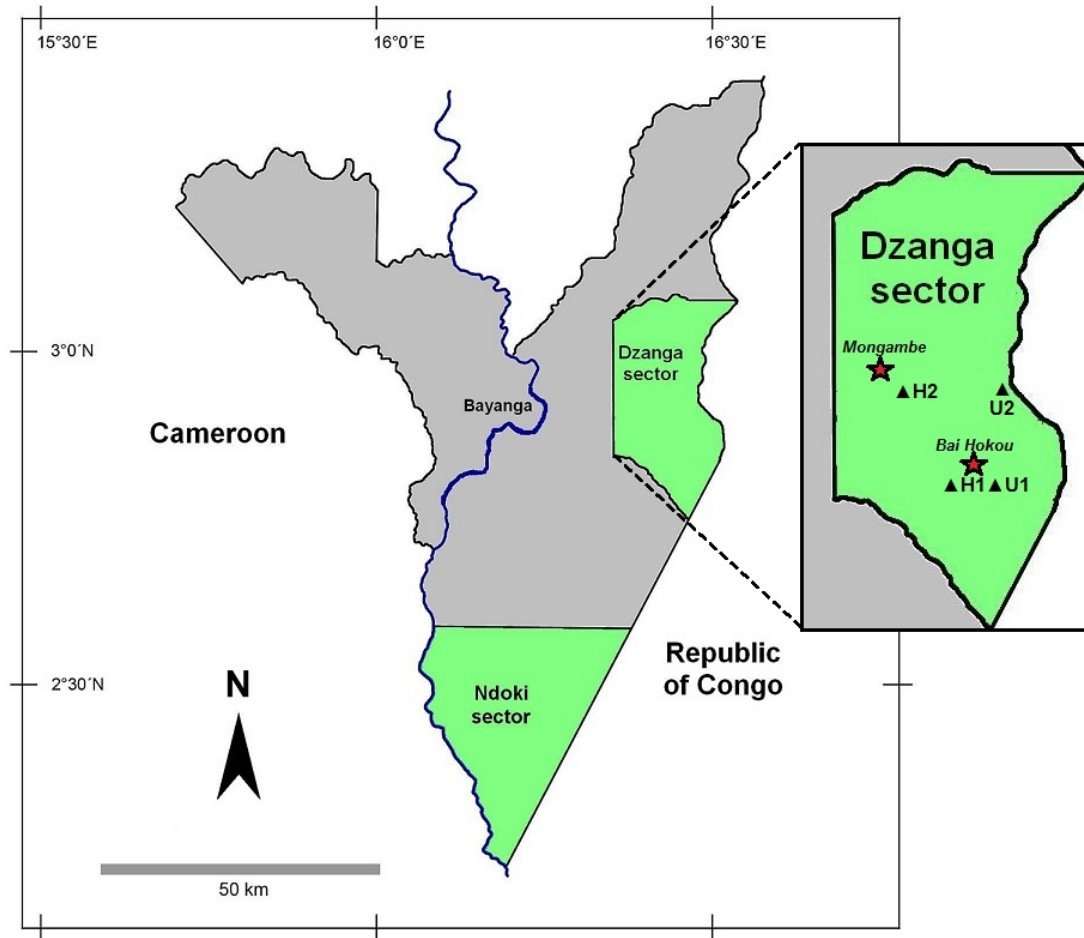

**Figure S1.** Map of the study site in Dzanga-Sangha Protected Areas, Central African Republic. Picture modified from Vlčková et al. (2016).

**Table S1.** List of fecal samples of individual gorillas from four gorilla groups

| <b>Gorilla group</b> | <b>Individual</b> | <b>Age group</b> | <b>Sex</b> |
|----------------------|-------------------|------------------|------------|
| U1                   | #1                | NA               | NA         |
| U1                   | #2                | NA               | NA         |
| U1                   | #3                | NA               | NA         |
| U1                   | #4                | NA               | NA         |
| U1                   | #5                | NA               | NA         |
| U1                   | #6                | NA               | NA         |
| U1                   | #7                | NA               | NA         |
| U1                   | #8                | NA               | NA         |
| U1                   | #9                | NA               | NA         |
| U1                   | #10               | NA               | NA         |
| U1                   | #11               | NA               | NA         |
| H1                   | Bokata            | Juvenile         | Female     |
| H1                   | Kunga             | Subadult         | Male       |
| H1                   | Makumba           | Adult            | Male       |
| H1                   | Malui             | Adult            | Female     |
| H1                   | Mobangi           | Juvenile         | Male       |
| H1                   | Mopambi           | Adult            | Female     |
| H1                   | Mossoko           | Juvenile         | Female     |
| H1                   | Sopo              | Baby             | Female     |
| H1                   | Tembo             | Baby             | Male       |
| H2                   | Elili             | Adult            | Female     |
| H2                   | Liamba            | Juvenile         | Female     |
| H2                   | Lungu/Kaya        | Baby             | NA         |
| H2                   | Mambeka           | Subadult         | Female     |
| H2                   | Mapoki            | Adult            | Female     |
| H2                   | Mayele            | Adult            | Male       |
| H2                   | Mopangu           | Subadult         | Male       |
| H2                   | Mwangale          | Baby             | NA         |
| H2                   | Ngobo             | Juvenile         | Male       |
| H2                   | Penge             | Adult            | Female     |
| H2                   | Sosa              | Subadult         | Male       |
| H2                   | Yoko              | Juvenile         | Male       |
| U2                   | #1                | NA               | NA         |
| U2                   | #2                | NA               | NA         |
| U2                   | #3                | NA               | NA         |
| U2                   | #4                | NA               | NA         |
| U2                   | #5                | NA               | NA         |
| U2                   | #6                | NA               | NA         |
| U2                   | #7                | NA               | NA         |
| U2                   | #8                | NA               | NA         |
| U2                   | #9                | NA               | NA         |
| U2                   | #10               | NA               | NA         |
| U2                   | #11               | NA               | NA         |

**Table S2.** Presence/absence of parasites detected in individual gorillas from four groups

| Gorilla group | Individual | Unident. entod. ciliates | <i>Trogloodytella/ Gorillophilus</i> | <i>Prototapirella gorillae</i> | <i>Blasto-cystis</i> | <i>Entamoeba</i> | <i>Strongyloides</i> | <i>Necator/Oesophagostomum</i> | <i>Mammomonogamus</i> | <i>Bertiella</i> | <i>Spirurida</i> fam. gen. |
|---------------|------------|--------------------------|--------------------------------------|--------------------------------|----------------------|------------------|----------------------|--------------------------------|-----------------------|------------------|----------------------------|
| U1            | #1         | 0                        | 1                                    | 1                              | 0                    | 0                | 0                    | 1                              | 1                     | 0                | 1                          |
| U1            | #2         | 1                        | 1                                    | 1                              | 0                    | 0                | 0                    | 1                              | 0                     | 0                | 0                          |
| U1            | #3         | 0                        | 1                                    | 1                              | 0                    | 1                | 0                    | 1                              | 0                     | 0                | 0                          |
| U1            | #4         | 0                        | 1                                    | 1                              | 0                    | 0                | 0                    | 1                              | 1                     | 0                | 0                          |
| U1            | #5         | 1                        | 1                                    | 1                              | 0                    | 0                | 0                    | 1                              | 1                     | 0                | 0                          |
| U1            | #6         | 1                        | 1                                    | 1                              | 0                    | 0                | 0                    | 1                              | 1                     | 0                | 1                          |
| U1            | #7         | 1                        | 1                                    | 0                              | 0                    | 0                | 0                    | 1                              | 1                     | 0                | 0                          |
| U1            | #8         | 0                        | 1                                    | 1                              | 0                    | 1                | 0                    | 1                              | 1                     | 0                | 0                          |
| U1            | #9         | 0                        | 1                                    | 1                              | 0                    | 0                | 0                    | 1                              | 0                     | 0                | 1                          |
| U1            | #10        | 0                        | 1                                    | 1                              | 0                    | 0                | 0                    | 1                              | 0                     | 0                | 0                          |
| U1            | #11        | 0                        | 1                                    | 1                              | 0                    | 1                | 0                    | 1                              | 1                     | 0                | 1                          |
| H1            | Bokata     | 1                        | 1                                    | 1                              | 0                    | 1                | 0                    | 1                              | 1                     | 0                | 1                          |
| H1            | Kunga      | 0                        | 1                                    | 1                              | 0                    | 1                | 0                    | 1                              | 0                     | 0                | 0                          |
| H1            | Makumba    | 1                        | 1                                    | 1                              | 0                    | 1                | 0                    | 1                              | 0                     | 0                | 0                          |
| H1            | Malui      | 0                        | 1                                    | 1                              | 0                    | 0                | 0                    | 1                              | 1                     | 0                | 1                          |
| H1            | Mobangi    | 0                        | 1                                    | 1                              | 0                    | 1                | 0                    | 1                              | 1                     | 0                | 0                          |
| H1            | Mopambi    | 0                        | 1                                    | 1                              | 0                    | 1                | 0                    | 1                              | 1                     | 0                | 0                          |
| H1            | Mossoko    | 1                        | 1                                    | 1                              | 0                    | 1                | 0                    | 1                              | 1                     | 0                | 1                          |
| H1            | Sopo       | 1                        | 1                                    | 1                              | 0                    | 1                | 0                    | 1                              | 0                     | 0                | 0                          |
| H1            | Tembo      | 1                        | 1                                    | 1                              | 0                    | 1                | 1                    | 1                              | 0                     | 0                | 0                          |
| H2            | Elili      | 1                        | 1                                    | 1                              | 0                    | 1                | 0                    | 1                              | 1                     | 0                | 0                          |
| H2            | Liamba     | 0                        | 1                                    | 1                              | 0                    | 0                | 0                    | 1                              | 1                     | 0                | 1                          |
| H2            | Lungu/Kaya | 1                        | 0                                    | 0                              | 0                    | 0                | 1                    | 1                              | 0                     | 0                | 0                          |
| H2            | Mambeka    | 1                        | 1                                    | 1                              | 0                    | 1                | 0                    | 1                              | 1                     | 0                | 1                          |
| H2            | Mapoki     | 1                        | 1                                    | 1                              | 0                    | 1                | 0                    | 1                              | 0                     | 0                | 1                          |
| H2            | Mayele     | 1                        | 1                                    | 1                              | 0                    | 1                | 0                    | 1                              | 1                     | 0                | 1                          |
| H2            | Mopangu    | 1                        | 1                                    | 1                              | 1                    | 0                | 0                    | 1                              | 1                     | 0                | 1                          |
| H2            | Mwangale   | 0                        | 1                                    | 1                              | 0                    | 1                | 0                    | 1                              | 1                     | 0                | 1                          |
| H2            | Ngobo      | 1                        | 1                                    | 1                              | 1                    | 0                | 0                    | 1                              | 0                     | 0                | 0                          |
| H2            | Penge      | 0                        | 1                                    | 1                              | 0                    | 0                | 0                    | 1                              | 1                     | 1                | 1                          |
| H2            | Sosa       | 1                        | 1                                    | 1                              | 0                    | 1                | 0                    | 1                              | 1                     | 0                | 1                          |
| H2            | Yoko       | 1                        | 1                                    | 1                              | 1                    | 1                | 0                    | 1                              | 1                     | 0                | 0                          |
| U2            | #1         | 0                        | 1                                    | 1                              | 0                    | 1                | 0                    | 1                              | 0                     | 0                | 0                          |
| U2            | #2         | 0                        | 1                                    | 1                              | 0                    | 0                | 0                    | 1                              | 1                     | 0                | 0                          |
| U2            | #3         | 1                        | 1                                    | 1                              | 1                    | 0                | 0                    | 1                              | 1                     | 0                | 0                          |
| U2            | #4         | 0                        | 1                                    | 1                              | 0                    | 0                | 0                    | 0                              | 1                     | 0                | 0                          |

Continued on the next page

**Table S2.** Presence/absence of parasites detected in individual gorillas from four groups

| Gorilla group | Individual | Unident. entod. ciliates | <i>Trogloodytella/ Gorillophitus</i> | <i>Prototapirella gorillae</i> | <i>Blastocystis</i> | <i>Entamoeba</i> | <i>Strongyloides</i> | <i>Necator/Oesophagostomum</i> | <i>Mammomonogamus</i> | <i>Bertiella</i> | Spirurida fam. gen. |
|---------------|------------|--------------------------|--------------------------------------|--------------------------------|---------------------|------------------|----------------------|--------------------------------|-----------------------|------------------|---------------------|
| U2            | #5         | 0                        | 1                                    | 1                              | 0                   | 0                | 0                    | 1                              | 1                     | 0                | 0                   |
| U2            | #6         | 0                        | 1                                    | 1                              | 0                   | 1                | 1                    | 1                              | 1                     | 0                | 1                   |
| U2            | #7         | 0                        | 1                                    | 1                              | 0                   | 1                | 0                    | 1                              | 0                     | 0                | 0                   |
| U2            | #8         | 1                        | 1                                    | 1                              | 0                   | 0                | 0                    | 1                              | 1                     | 0                | 0                   |
| U2            | #9         | 1                        | 1                                    | 1                              | 0                   | 1                | 0                    | 1                              | 0                     | 0                | 1                   |
| U2            | #10        | 0                        | 1                                    | 1                              | 0                   | 0                | 1                    | 1                              | 1                     | 0                | 0                   |
| U2            | #11        | 0                        | 1                                    | 1                              | 0                   | 1                | 0                    | 1                              | 0                     | 0                | 0                   |

**Table S3.** Intensity (EPG) of infection of *Necator/Oesophagostomum* spp. and *Mammomonogamus* sp. in individual gorillas from four groups

| Gorilla group | Individual | <i>Necator/Oesophagostomum</i> | <i>Mammomonogamus</i> |
|---------------|------------|--------------------------------|-----------------------|
| U1            | #1         | 89.84                          | 93.75                 |
| U1            | #2         | 12.38                          | 0                     |
| U1            | #3         | 22.96                          | 0                     |
| U1            | #4         | 47.49                          | 25.14                 |
| U1            | #5         | 51.98                          | 14.85                 |
| U1            | #6         | 92                             | 32                    |
| U1            | #7         | 58.33                          | 25                    |
| U1            | #8         | 4.52                           | 2.16                  |
| U1            | #9         | 67.38                          | 0                     |
| U1            | #10        | 36.48                          | 0                     |
| U1            | #11        | 56.39                          | 37.59                 |
| H1            | Bokata     | 26.88                          | 8.06                  |
| H1            | Kunga      | 5.1                            | 0                     |
| H1            | Makumba    | 5.78                           | 0                     |
| H1            | Malui      | 63.83                          | 17.73                 |
| H1            | Mobangi    | 36.59                          | 12.2                  |
| H1            | Mopambi    | 1                              | 4.69                  |
| H1            | Mossoko    | 22.1                           | 2.76                  |
| H1            | Sopo       | 4.61                           | 0                     |
| H1            | Tembo      | 2.79                           | 0                     |
| H2            | Elili      | 12.82                          | 20.51                 |
| H2            | Liamba     | 29.41                          | 8.02                  |
| H2            | Lungu/Kaya | 45.45                          | 17.05                 |
| H2            | Mambeka    | 44.78                          | 34.83                 |
| H2            | Mapoki     | 67.31                          | 0                     |
| H2            | Mayele     | 29.41                          | 22.06                 |
| H2            | Mopangu    | 1                              | 3.91                  |
| H2            | Mwangale   | 28.13                          | 3.13                  |
| H2            | Ngobo      | 9.09                           | 0                     |
| H2            | Penge      | 40.27                          | 10.07                 |
| H2            | Sosa       | 54.05                          | 87.84                 |
| H2            | Yoko       | 5.73                           | 7.63                  |
| U2            | #1         | 19.23                          | 0                     |
| U2            | #2         | 25.74                          | 3.68                  |
| U2            | #3         | 21.62                          | 2.7                   |
| U2            | #4         | 0                              | 2.37                  |
| U2            | #5         | 2.6                            | 2.6                   |
| U2            | #6         | 24.44                          | 7.52                  |
| U2            | #7         | 2.1                            | 0                     |
| U2            | #8         | 4.85                           | 2.43                  |
| U2            | #9         | 11.11                          | 0                     |
| U2            | #10        | 2.65                           | 0                     |
| U2            | #11        | 1.87                           | 0                     |

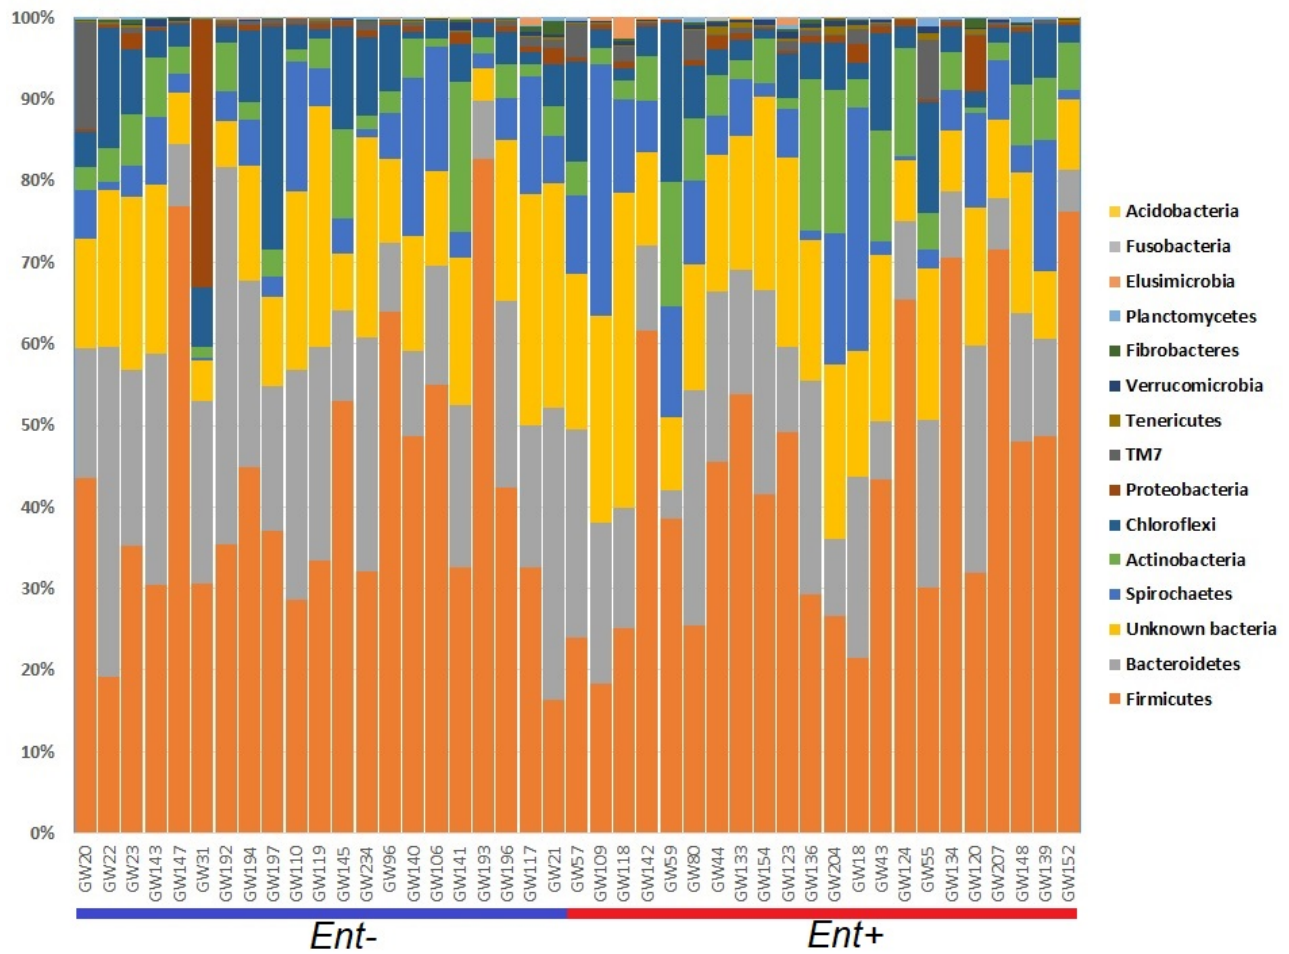

Figure S2. Relative abundances of bacterial phyla in *Ent+* and *Ent-* gorillas

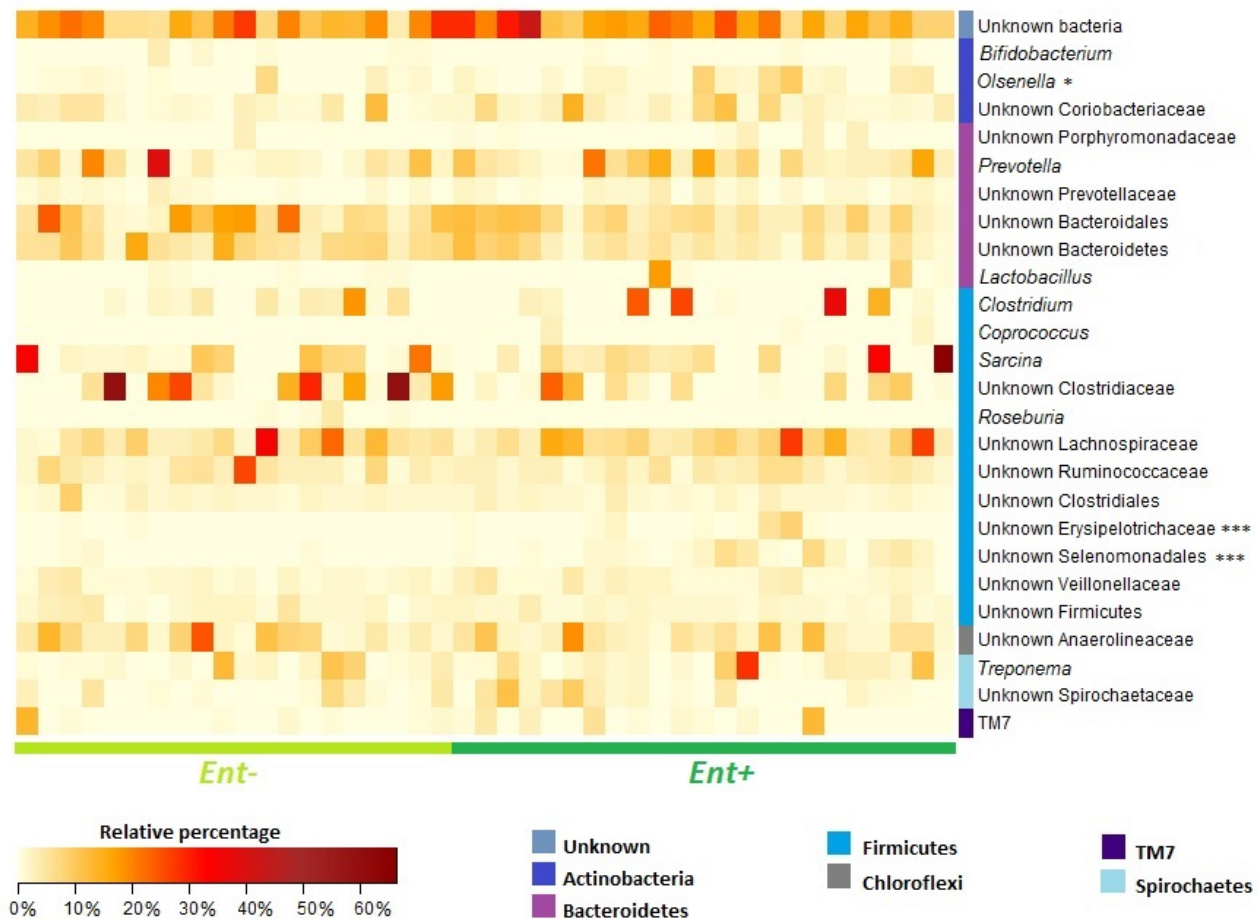

**Figure S3.** Heatmap showing 26 most abundant bacterial genera in *Ent-* and *Ent+* individuals. Significant differences between *Ent-* and *Ent+* individuals based on GLM with negative binomial distribution: \*\*\* 0.001, \* 0.5.

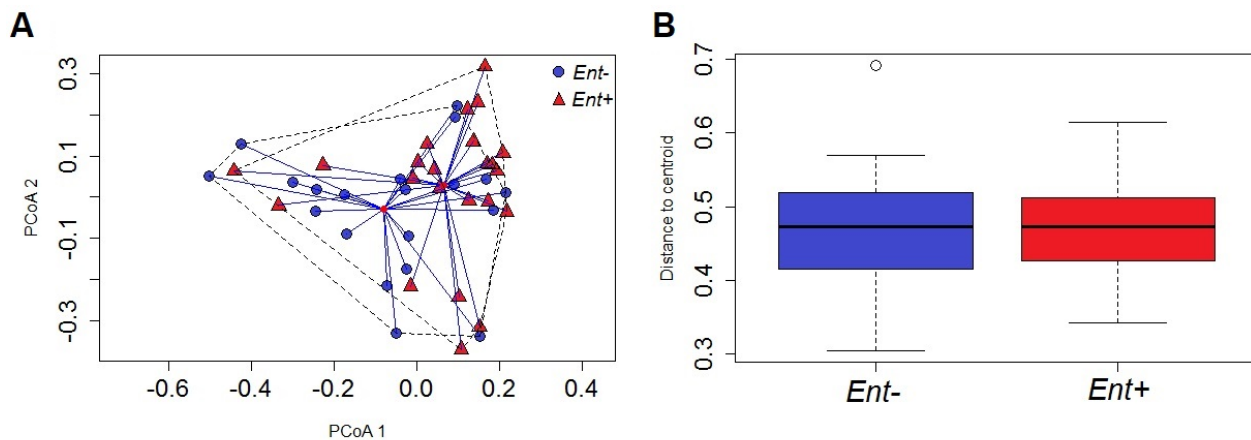

**Figure S4.** GIM dispersion of *Ent+* and *Ent-* individuals (**A**) in multivariate space and (**B**) in boxplots.

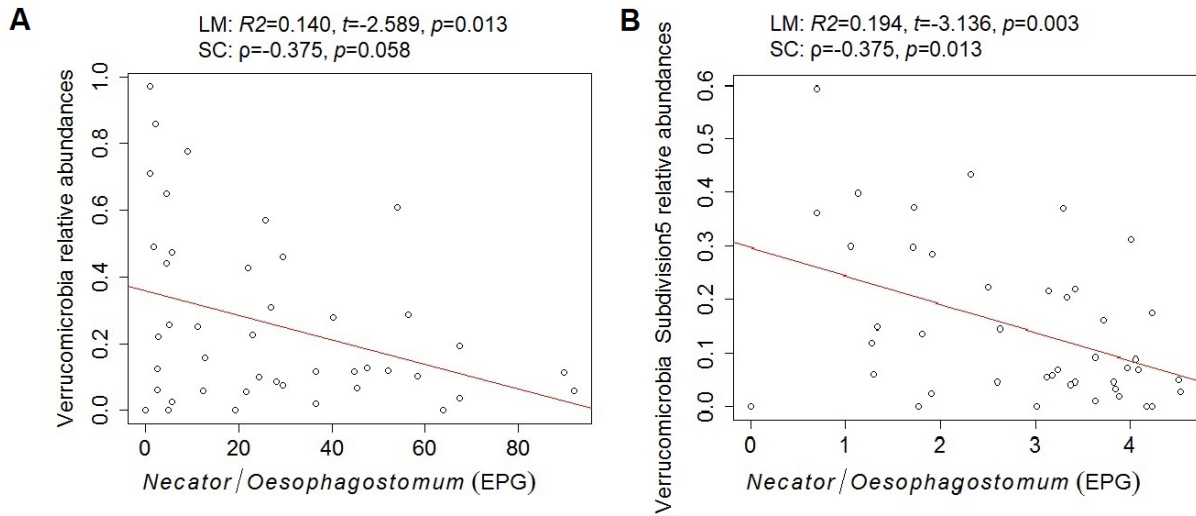

**Figure S5.** Linear regression model of relationships between the egg counts of *Necator/Oesophagostomum* spp. and relative abundances of significant bacterial phylum (A) and family (B) of individual gorillas (natural log-transformed data). LM=linear regression model, SC=Spearman's rank correlation.

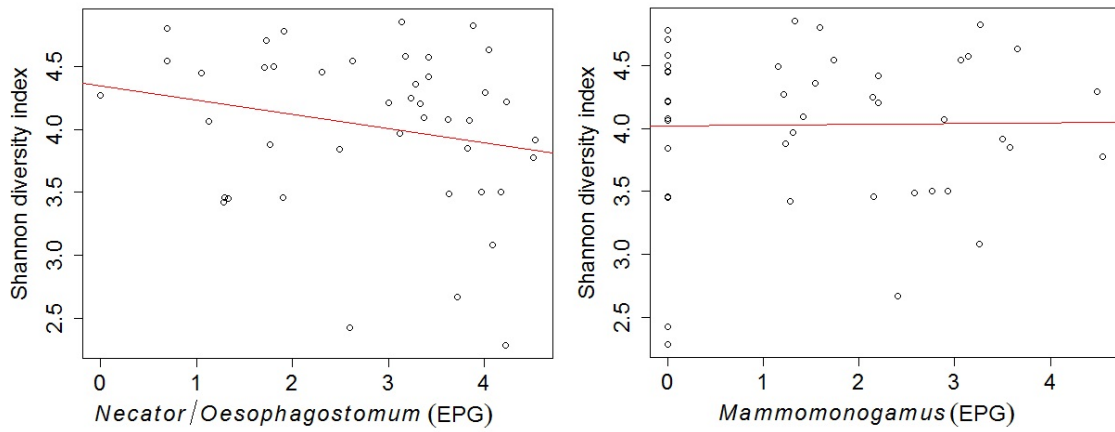

**Figure S6.** Linear regression model of relationships between GIM diversity (Shannon diversity indices) and egg counts of *Necator/Oesophagostomum* ( $p>0.05$ ) and *Mammomonogamus* ( $p>0.05$ ) (natural log-transformed data).
